# Supplementary material for: Mitochondrial One-Carbon Metabolism is Required for TGF-β-Induced Glycine Synthesis and Collagen Protein Production
Source: PubMed Central journal article supplement (PMC10659399; doi:10.1101/2023.11.07.566074), 2023-11-07

## SUPPLEMENTARY FIGURE LEGENDS

**Figure S1. Mitochondrial one-carbon enzymes are induced by TGF- $\beta$ .** **(A-D)** Quantification of relative (A) MTHFD2, (B) ALDH1L2, (C) MTHFD1L, and (D) MTHFD1 protein levels after treatment of normal human lung fibroblasts (NHLFs) treated with TGF- $\beta$  for the indicated intervals. **(E-H)** Quantification of relative (E) MTHFD2, (F) ALDH1L2, (G) MTHFD1L, and (H) MTHFD1 protein levels after treatment of NHLFs transfected with siRNA targeting ATF4 or nontargeting siRNA. Cells were treated with TGF- $\beta$  for the indicated intervals. **(I-L)** Quantification of relative (I) MTHFD2, (J) ALDH1L2, (K) MTHFD1L, and (L) MTHFD1 protein levels after treatment of NHLFs with TGF- $\beta$  for the indicated intervals in the presence or absence of Rapalink-1. Bar graphs

represent mean  $\pm$  SEM, n=3 independent experimental replicates. \* $P$ <0.05, \*\* $P$ <0.01, \*\*\* $P$ <0.001.

**Figure S2. Mitochondrial one-carbon metabolism is required for TGF- $\beta$ -induced collagen protein production. (A-B)** Western blot analysis of collagen and  $\alpha$ -smooth muscle actin ( $\alpha$ -SMA) protein expression in normal human lung fibroblasts (NHLFs) transfected with siRNAs targeting *MTHFD2* or nontargeting siRNA. Cells were treated with TGF- $\beta$  for the indicated intervals in the presence of the indicated doses of formate. **(C)** Western blot analysis of collagen and  $\alpha$ -SMA protein expression in NHLFs treated TGF- $\beta$  for the indicated intervals in the presence of the indicated doses of methotrexate (MTX). **(D-E)** Western blot analysis of collagen and  $\alpha$ -SMA protein expression in NHLFs transfected with siRNAs targeting *MTHFD2* or nontargeting siRNA. Cells were treated with TGF- $\beta$  for the indicated intervals in the presence of the indicated doses of 5-methyl-tetrahydrofolate (mTHF).

**Figure S3. MTHFD2 is required for increased cellular glycine levels downstream of TGF- $\beta$ .** **(A)** Schematic representation of metabolite labeling downstream of  $^{13}\text{C}_2$ -Glycine. Normal human lung fibroblasts (NHLFs) were transfected with siRNA targeting *MTHFD2* or nontargeting siRNA. Cells were labeled with  $^{13}\text{C}_2$ -Glycine and treated with TGF- $\beta$  for 48 hours or left untreated. **(B)** Analysis of cellular glycine after labeling with  $^{13}\text{C}_2$ -Glycine in NHLFs treated with TGF- $\beta$  or left untreated. **(C)** Relative total glycine levels from (B). **(D)** Relative levels of M+0 (*de novo* synthesized) glycine from (B). **(E)** Analysis of cellular serine after labeling with  $^{13}\text{C}_2$ -Glycine in NHLFs treated with TGF- $\beta$  or left untreated. **(F)** Relative total serine levels from (E). **(G)** Relative levels of M+2 serine from (E). Bar graphs represent mean  $\pm$  SEM, n=3. \* $P$ <0.05, \*\* $P$ <0.01, \*\*\* $P$ <0.001.

**Figure S4. SHMT2 is required for increased cellular glycine levels downstream of TGF- $\beta$ .** Normal human lung fibroblasts (NHLFs) were transfected with siRNA targeting *SHMT2* or nontargeting siRNA. Cells were labeled with  $^{13}\text{C}_2$ -Glycine and treated with TGF- $\beta$  for 48 hours or

left untreated. **(A)** Analysis of cellular glycine after labeling with  $^{13}\text{C}$ -Glycine in NHLFs treated with TGF- $\beta$  or left untreated. **(B)** Relative total glycine levels from (A). **(C)** Relative levels of M+0 (*de novo* synthesized) glycine from (A). **(D)** Analysis of cellular serine after labeling with  $^{13}\text{C}$ -Glycine in NHLFs treated with TGF- $\beta$  or left untreated. **(E)** Relative total serine levels from (D). **(F)** Relative levels of M+2 serine from (D). Bar graphs represent mean  $\pm$  SEM, n=3. \* $P$ <0.05, \*\* $P$ <0.01, \*\*\* $P$ <0.001.

**Figure S5. Analysis of cellular metabolite levels in *MTHFD2* knockdown human lung fibroblasts.** Normal human lung fibroblasts (NHLFs) were transfected with siRNA targeting *MTHFD2* or nontargeting siRNA. Cells were labeled with 2,3,3-D $_3$ -Serine and treated with TGF- $\beta$  for 48 hours or left untreated. **(A)** Relative total glycine levels from Figure 3B. **(B)** Relative total serine levels from Figure 3D. **(C)** Relative total proline levels from Figure 3F. Bar graphs represent mean  $\pm$  SEM, n=3. \* $P$ <0.05, \*\* $P$ <0.01, \*\*\* $P$ <0.001.

**Figure S6. Analysis of cellular metabolite levels in *ALDH1L2* knockdown human lung fibroblasts.** Normal human lung fibroblasts (NHLFs) were transfected with siRNA targeting *ALDH1L2* or nontargeting siRNA. Cells were labeled with 2,3,3-D $_3$ -Serine and treated with TGF- $\beta$  for 48 hours or left untreated. **(A)** Relative total glycine levels from Figure 4A. **(B)** Relative levels of M+1 glycine from Figure 4A. **(C)** Relative total serine levels from Figure 4B. **(D)** Relative levels of M+1 and M+2 serine from Figure 4B. **(E)** Relative total proline levels from Figure 4C. **(F)** Relative levels of M+1 proline from Figure 4C. Bar graphs represent mean  $\pm$  SEM, n=3. \* $P$ <0.05, \*\* $P$ <0.01, \*\*\* $P$ <0.001.

**Figure S7. Analysis of cellular metabolite levels in *MTHFD1L* knockdown human lung fibroblasts.** Normal human lung fibroblasts (NHLFs) were transfected with siRNA targeting *MTHFD1L* or nontargeting siRNA. Cells were labeled with 2,3,3-D $_3$ -Serine and treated with TGF- $\beta$  for 48 hours or left untreated. **(A)** Relative total glycine levels from Figure 4E. **(B)** Relative levels of M+1 glycine from Figure 4E. **(C)** Relative total serine levels from Figure 4F. **(D)** Relative levels

of M+1 and M+2 serine from Figure 4F. **(E)** Relative total proline levels from Figure 4G. **(F)** Relative levels of M+1 proline from Figure 4G. Bar graphs represent mean  $\pm$  SEM, n=3. \* $P$ <0.05, \*\* $P$ <0.01, \*\*\* $P$ <0.001.

**Figure S8. Analysis of cellular metabolite levels in human lung fibroblasts with knockdown of both *ALDH1L2* and *MTHFD1L*.** Normal human lung fibroblasts (NHLFs) were transfected with siRNA targeting both *ALDH1L2* and *MTHFD1L* or nontargeting siRNA. Cells were labeled with 2,3,3-D3-Serine and treated with TGF- $\beta$  for 48 hours or left untreated. **(A)** Relative total glycine levels from Figure 4I. **(B)** Relative levels of M+1 glycine from Figure 4I. **(C)** Relative total serine levels from Figure 4J. **(D)** Relative levels of M+1 and M+2 serine from Figure 4J. **(E)** Relative total proline levels from Figure 4K. **(F)** Relative levels of M+1 proline from Figure 4K. Bar graphs represent mean  $\pm$  SEM, n=3. \* $P$ <0.05, \*\* $P$ <0.01, \*\*\* $P$ <0.001.

**Figure S9. *MTHFD1* is not required for increased cellular glycine levels downstream of TGF- $\beta$ .** Normal human lung fibroblasts (NHLFs) were transfected with siRNA targeting *MTHFD1* or nontargeting siRNA. Cells were labeled with 2,3,3-D3-Serine and treated with TGF- $\beta$  for 48 hours or left untreated. **(A)** Analysis of cellular glycine after labeling with 2,3,3-D3-Serine in NHLFs treated with TGF- $\beta$  or left untreated. **(B)** Relative total glycine levels from (A). **(C)** Relative levels of M+1 glycine from (A). **(D)** Analysis of cellular serine after labeling with 2,3,3-D3-Serine in NHLFs treated with TGF- $\beta$  or left untreated. **(E)** Relative total serine levels from (D). **(F)** Relative levels of M+1 and M+2 serine from (D). **(G)** Analysis of cellular proline after labeling with 2,3,3-D3-Serine in NHLFs treated with TGF- $\beta$  or left untreated. **(H)** Relative total serine levels from (G). **(I)** Relative levels of M+1 and M+2 serine from (G). Bar graphs represent mean  $\pm$  SEM, n=3. \* $P$ <0.05, \*\* $P$ <0.01, \*\*\* $P$ <0.001.

**Figure S10. Pharmacologic inhibition of *MTHFD2* inhibits fibrotic responses.** **(A)** Relative total glycine levels from Figure 5E. **(B)** Relative levels of M+1 glycine from Figure 5E. **(C)** Relative total serine levels from Figure 5F. **(D)** Relative levels of M+1 and M+2 serine from Figure 5F. **(E)**

Relative total proline levels from Figure 5G. **(F)** Relative levels of M+1 proline from Figure 5G. Bar graphs represent mean  $\pm$  SEM, n=3. **(G)** Representative transverse microCT images of mice prior to bleomycin instillation (Day 0), 7 days after bleomycin instillation (Day 7), and 14 days after bleomycin instillation (Day 14). Mice began receiving DS18561882 (125 mg/kg) or vehicle 8 days after bleomycin instillation. **(H)** Percent fibrotic area of lung from mice 21 days after bleomycin instillation. Mice received either vehicle or DS18561882 beginning on day 8. Bar graphs represent mean  $\pm$  SEM, n=5 independent mice per condition. \* $P$ <0.05, \*\* $P$ <0.01, \*\*\* $P$ <0.001.

**Figure S1**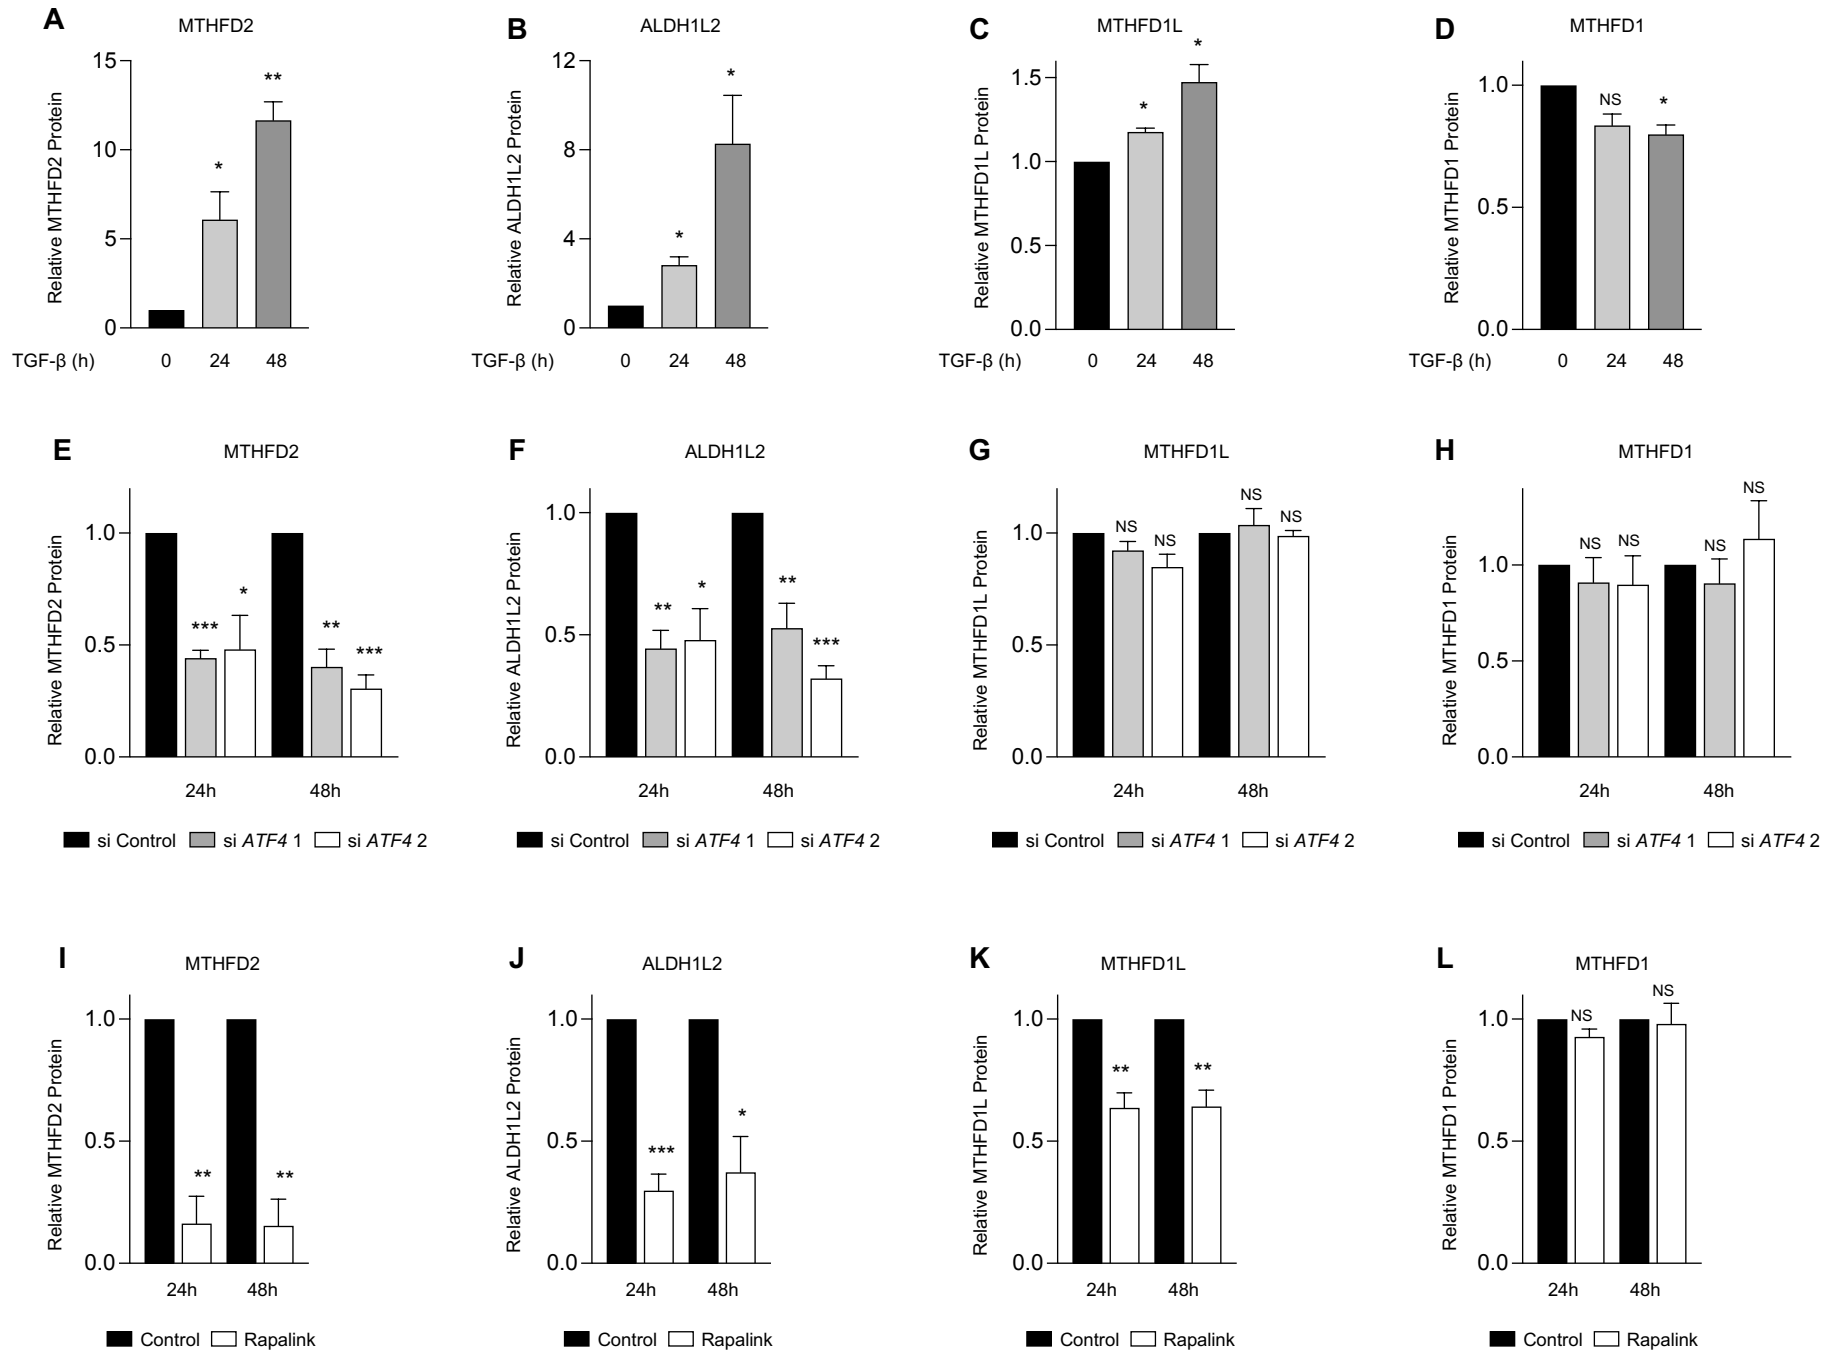

**Figure S2**

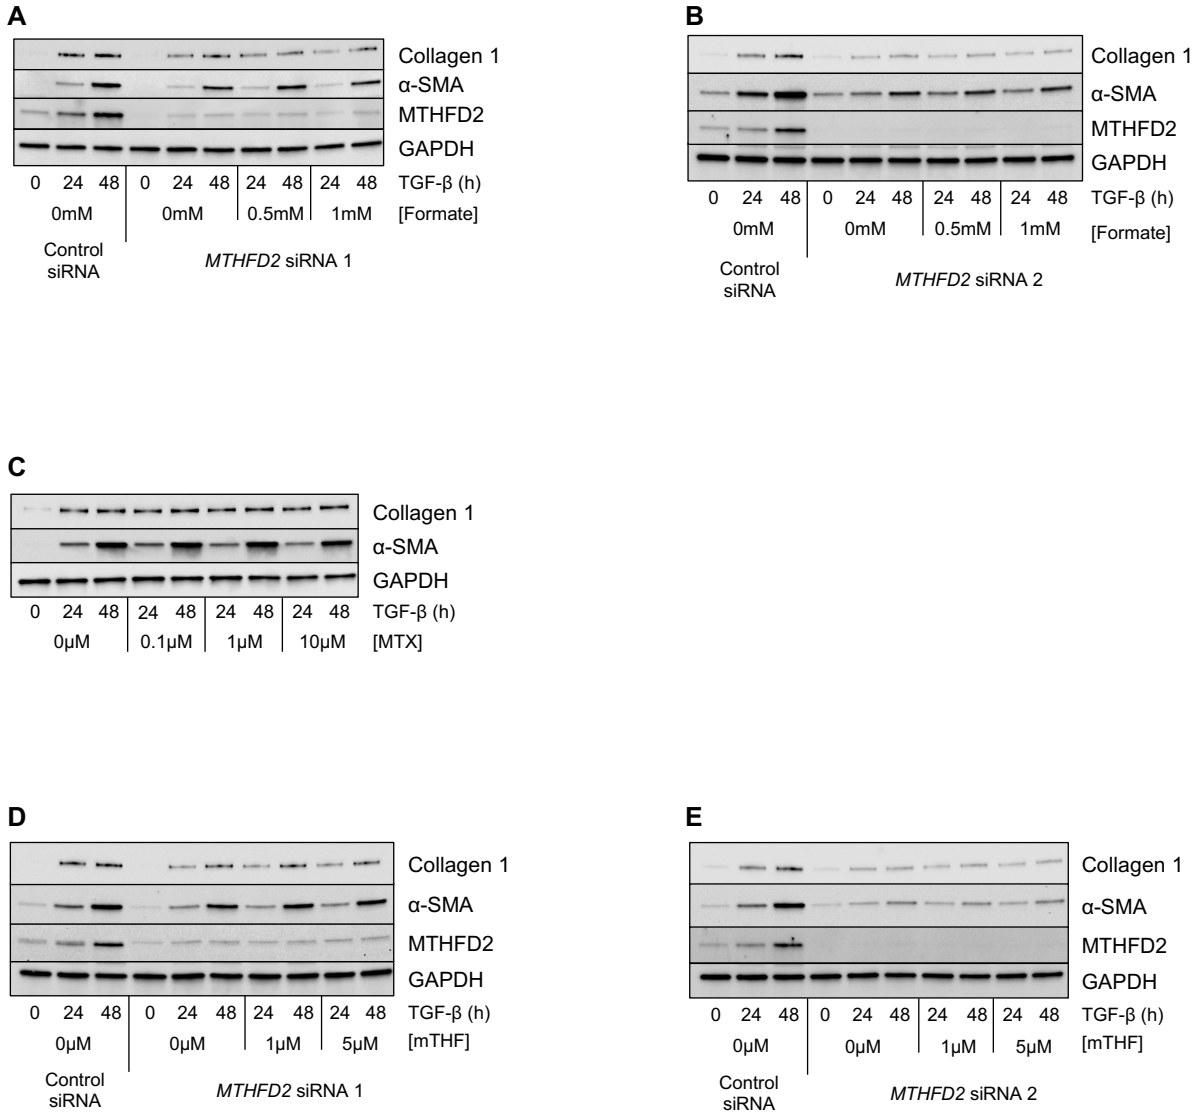

**Figure S3**

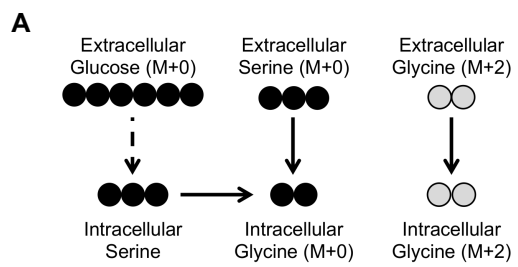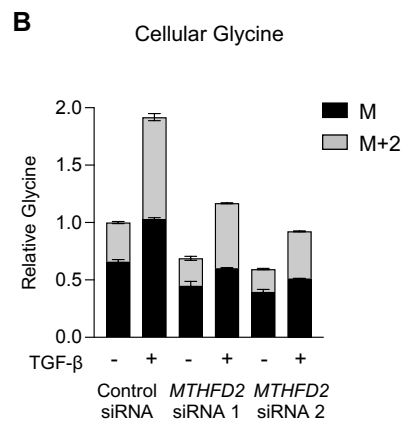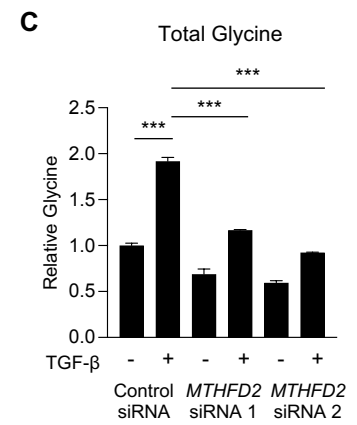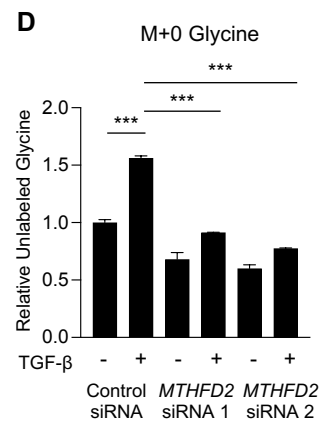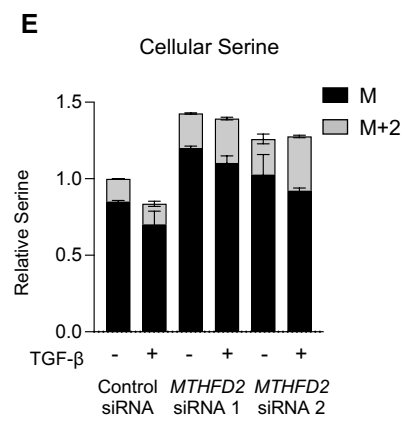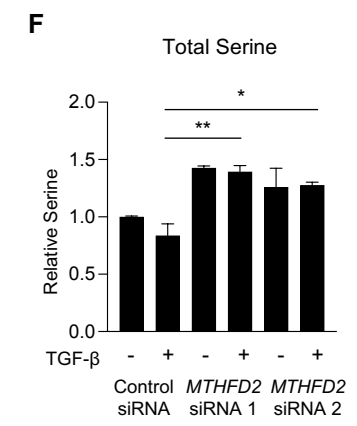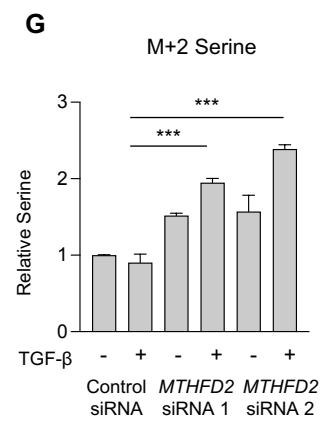



**Figure S4**

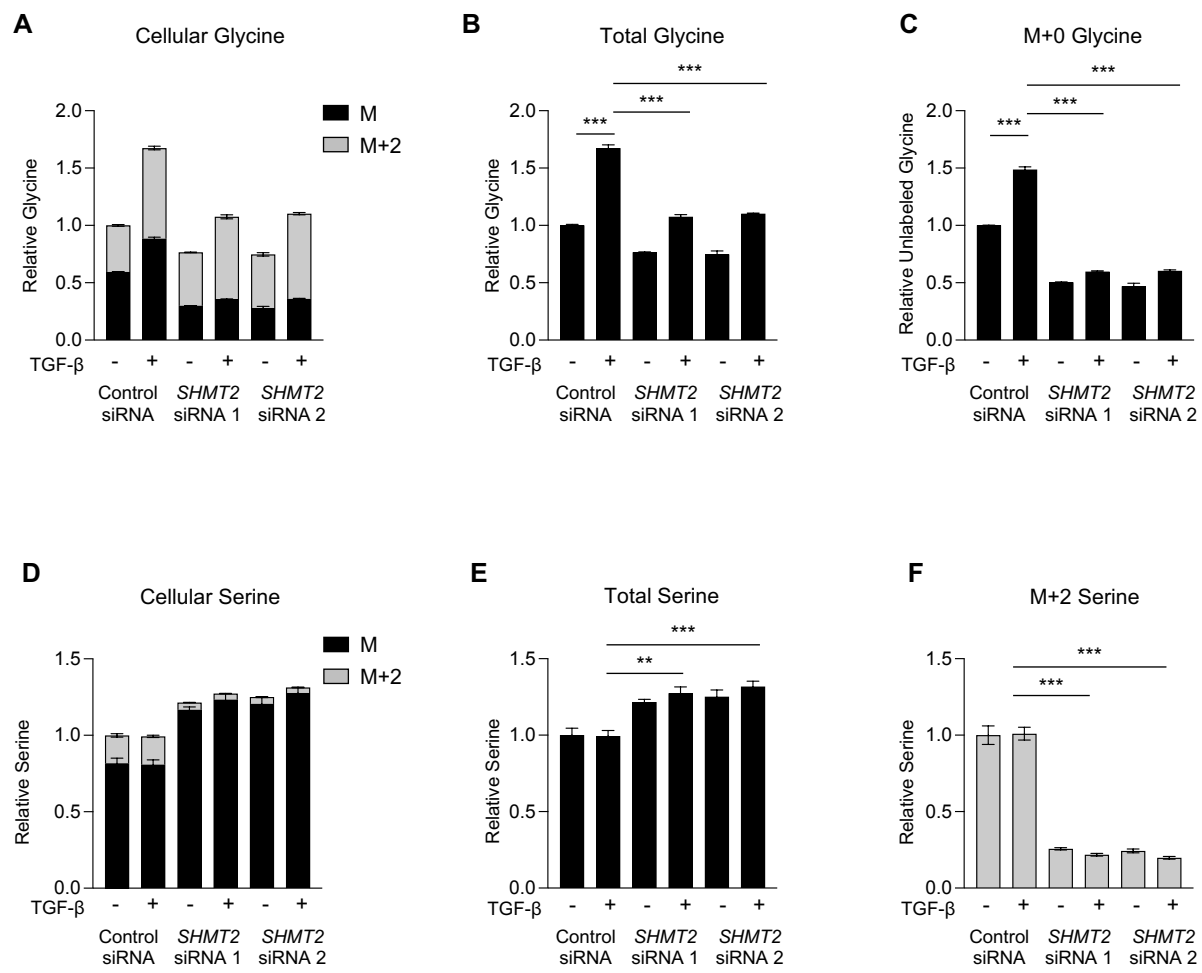

**Figure S5**

**A**

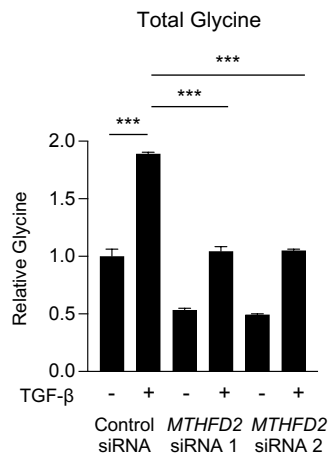

**B**

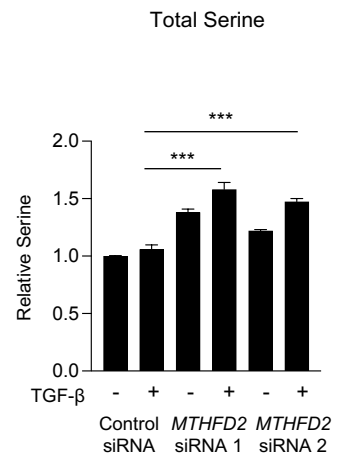

**C**

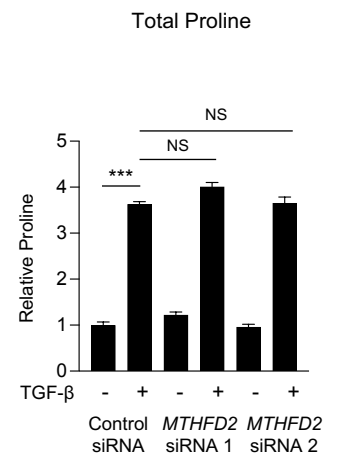

**Figure S6**

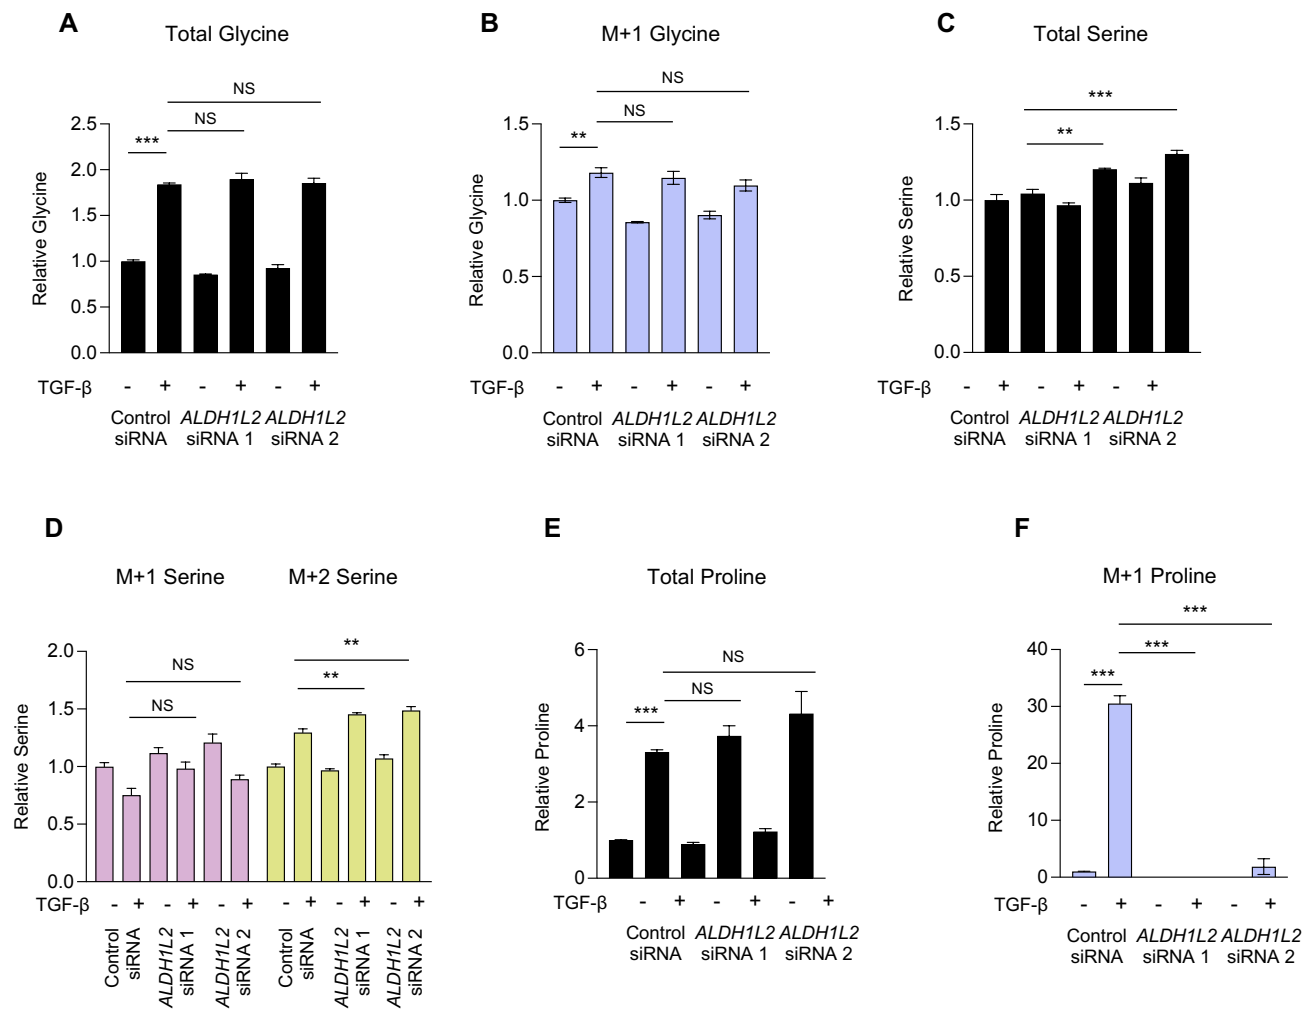

**Figure S7**

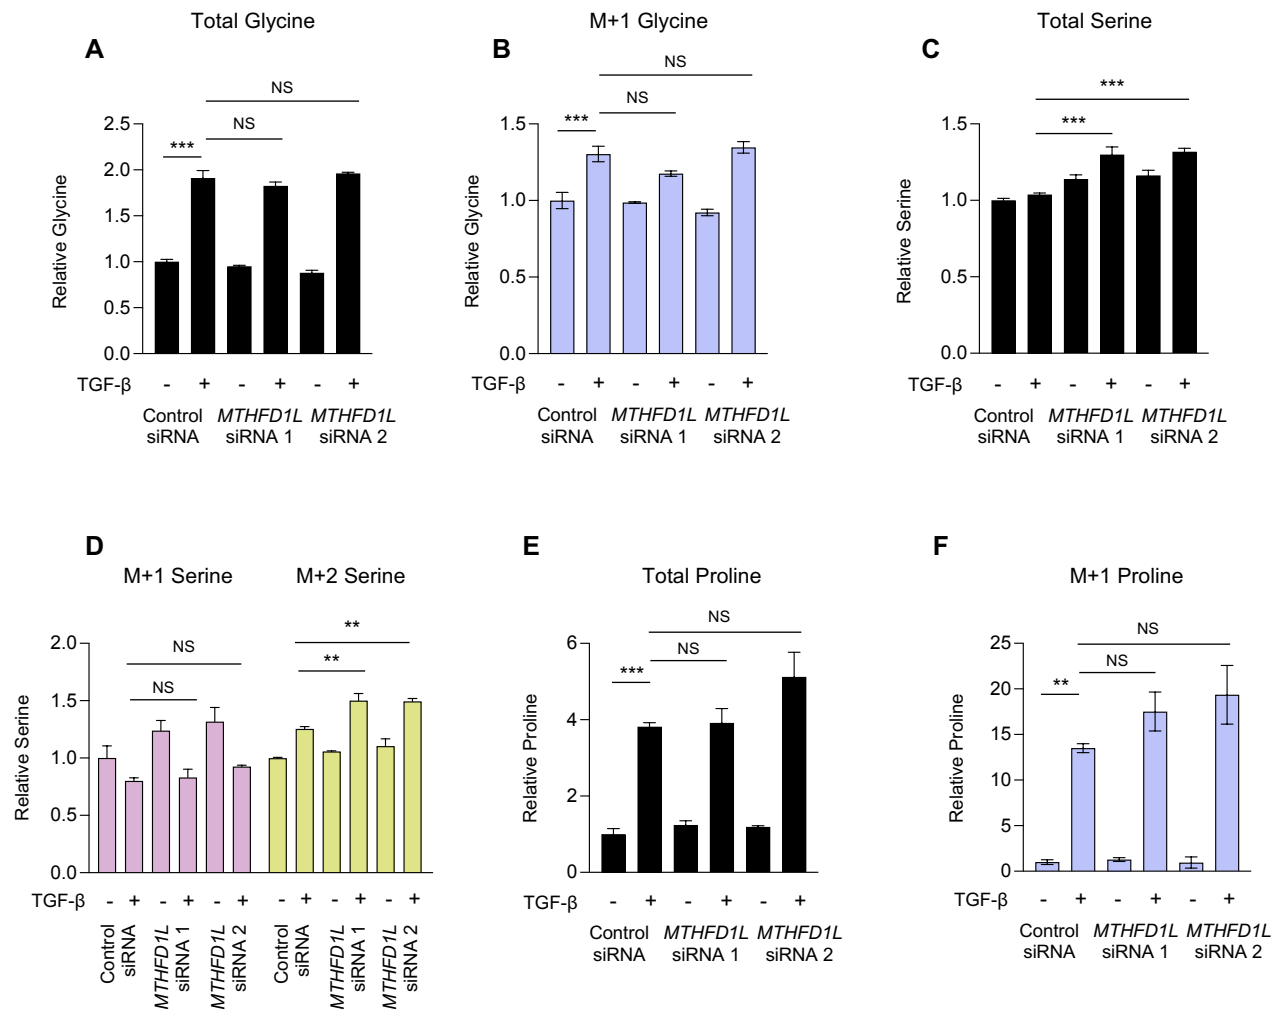

**Figure S8**

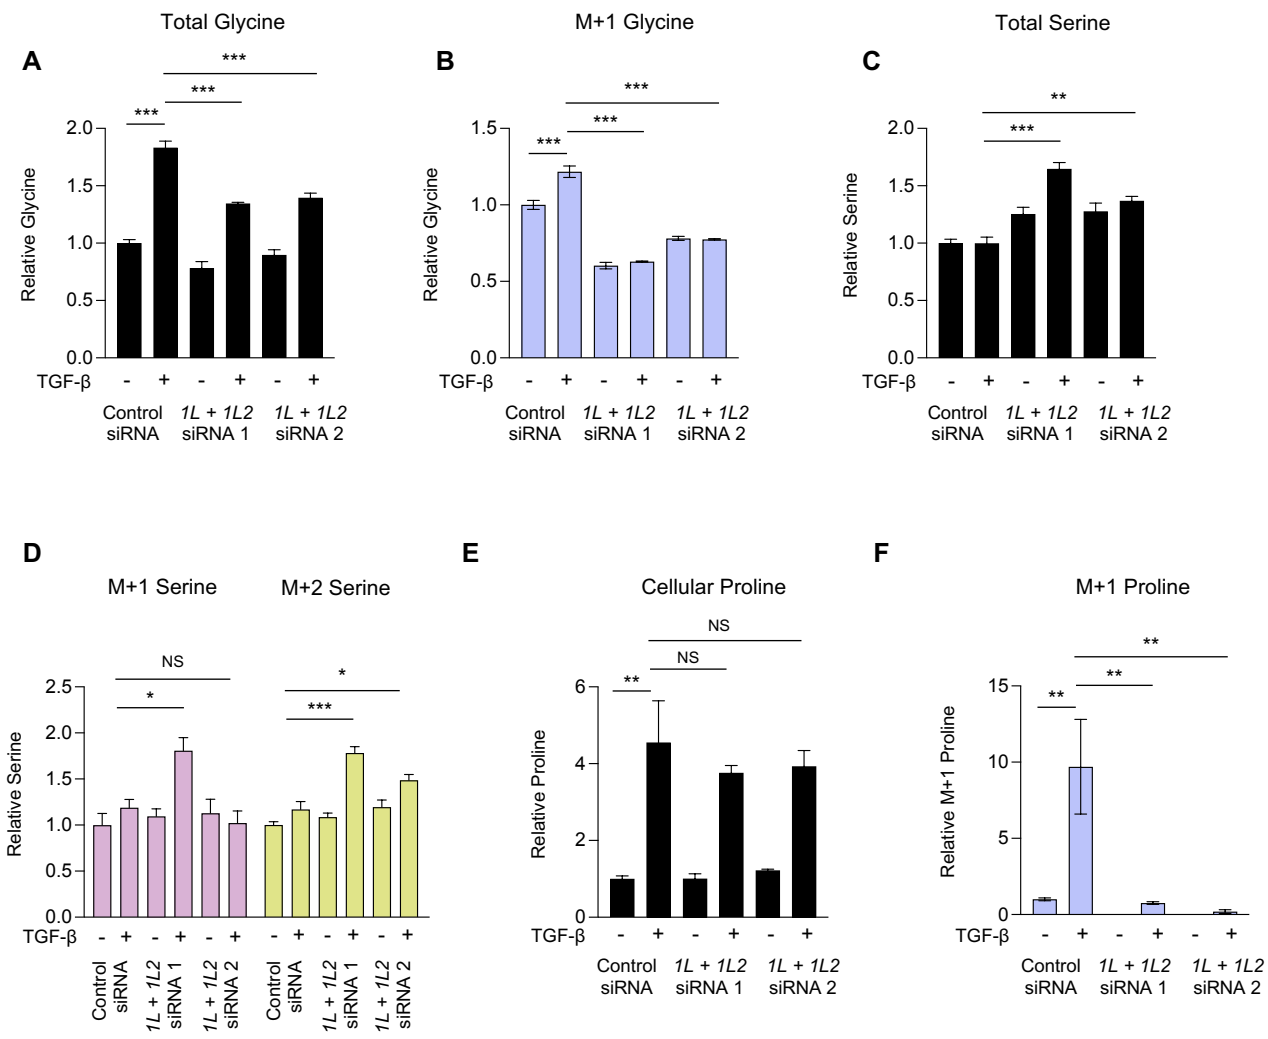

**Figure S9**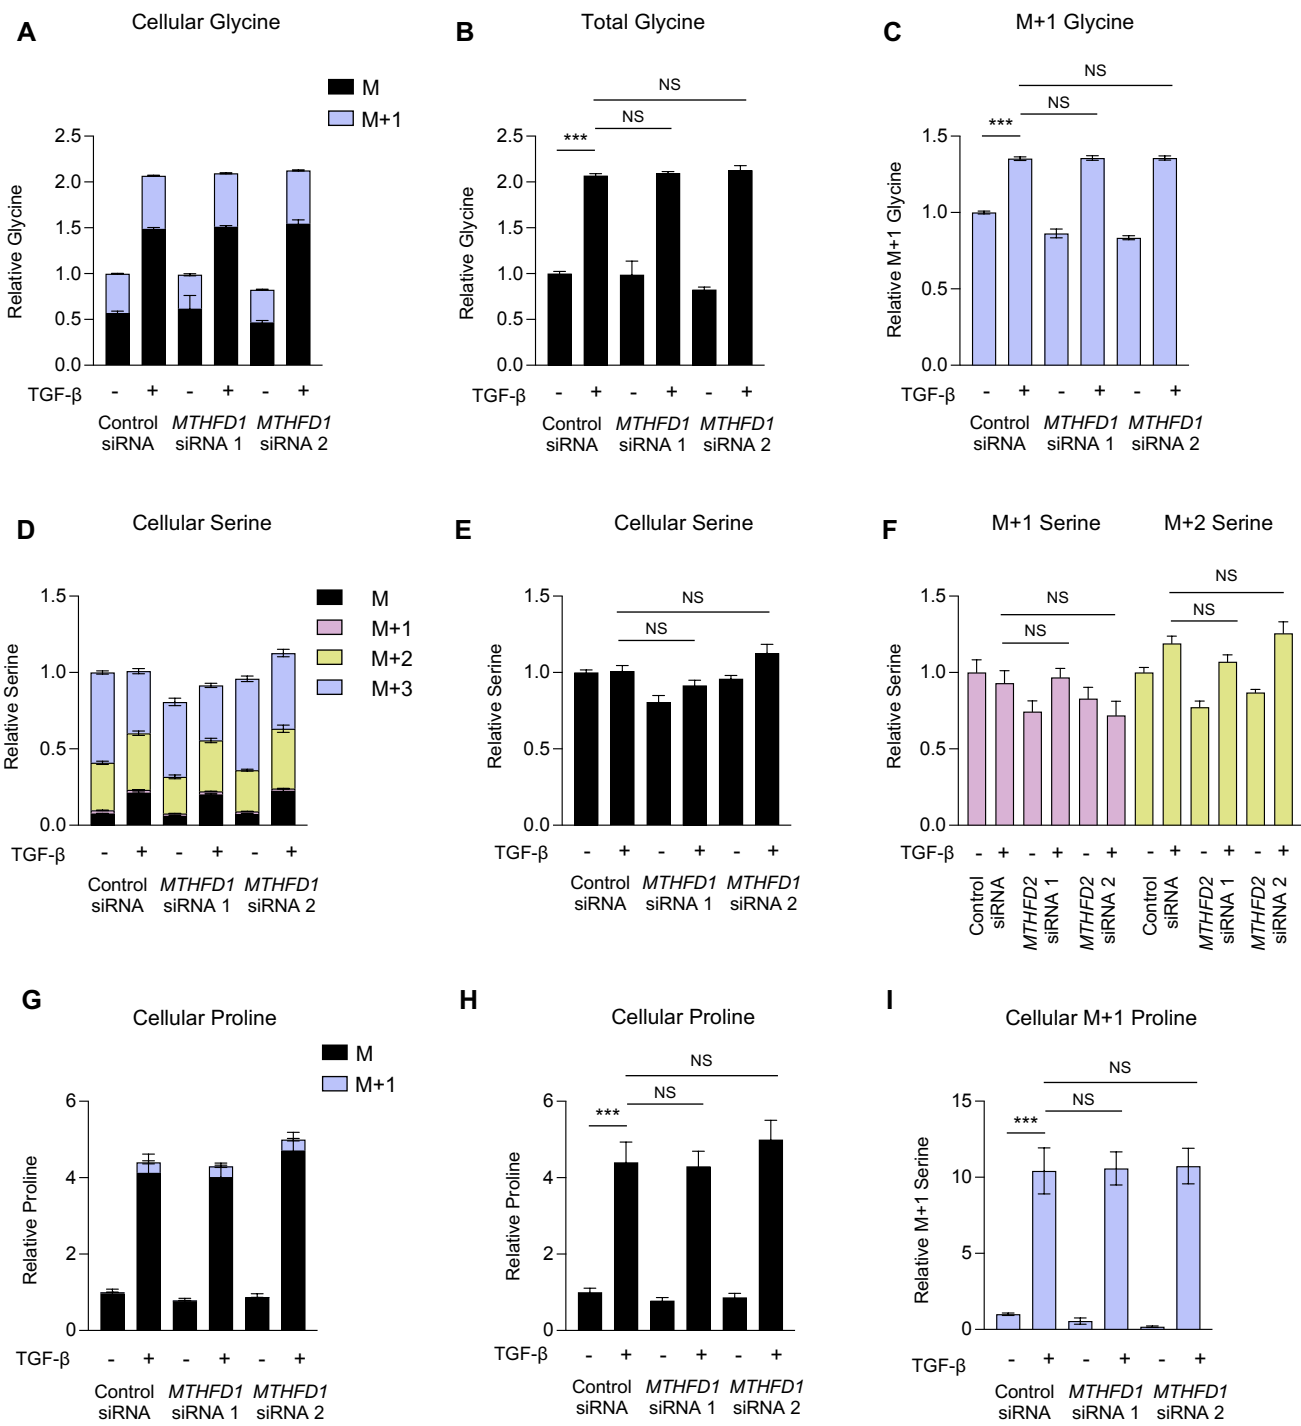

**Figure S10**

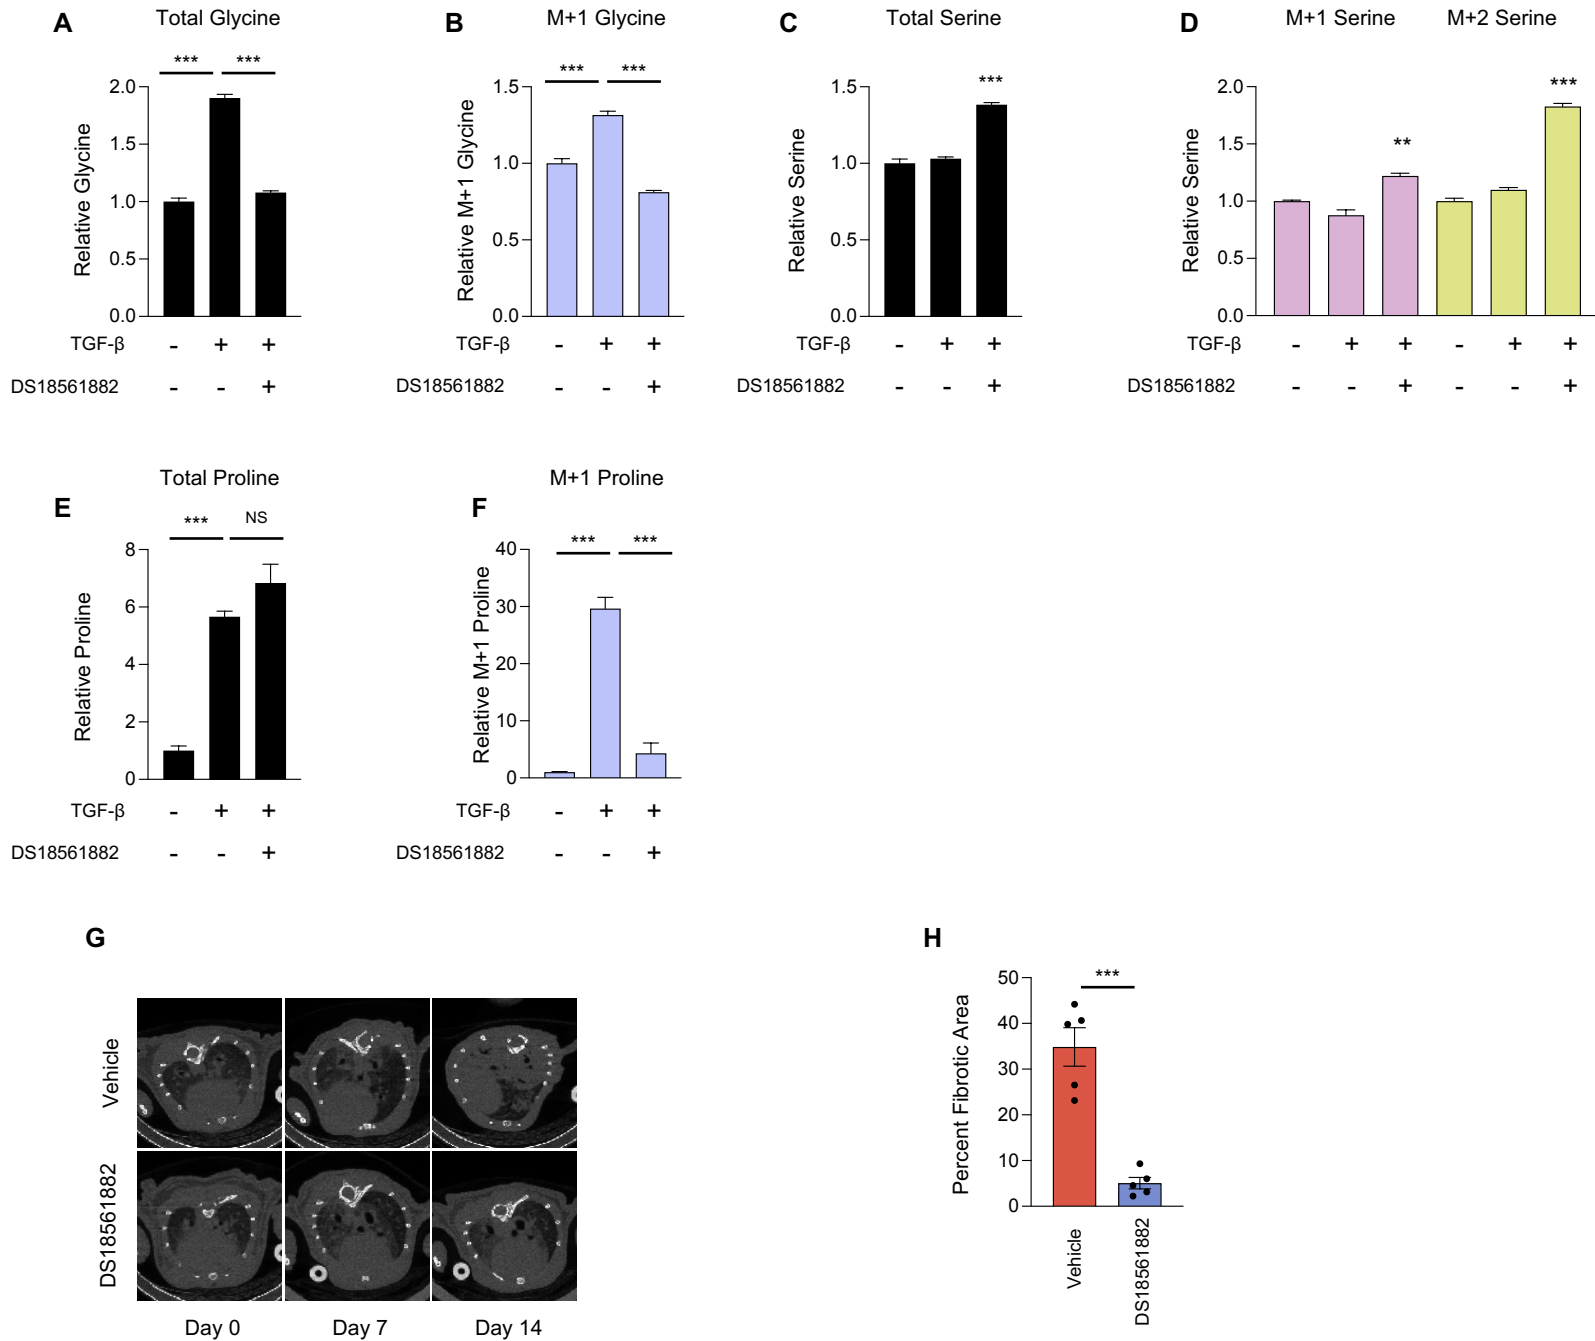

Supplement: NIHPP2023.11.07.566074V1-supplement-1.pdf [file NIHPP2023.11.07.566074V1-supplement-1.pdf]
